# Supplementary material for: Integrative genomic and transcriptomic analysis of leiomyosarcoma
Source: PubMed Central journal article supplement (PMC5762758; doi:10.1038/s41467-017-02602-0), 2018-01-10
Supplement: 41467_2017_2602_MOESM3_ESM.pdf [file 41467_2017_2602_MOESM3_ESM.pdf]

### **Description of Supplementary Files**

File Name: Supplementary Data 1

Description: Clinical characteristics and molecular analysis of 49 LMS patients.
